# Supplementary material for: Influence of Injection Well Location on CO2 Geological Storage Efficiency
Source: MDPI journal article supplement (doi:10.3390/en14248604), 2021-12-20
Supplement: s1 [file s1]

**Table S2.** Estimation results of the theoretical CO<sub>2</sub> storage capacity for the Konary structure in separate ten layers of the reservoir level.

| No    | Mean depth [m] | Geometric volume of layer $V_{trap}$ [Mm <sup>3</sup> ] | Pressure $P_i$ [MPa] | Temperature T [°C] | CO <sub>2</sub> density in reservoir conditions $\rho_{CO_2}$ [kg/m <sup>3</sup> ] | Theoretical Storage capacity $M_{CSLF}$ [Mt CO <sub>2</sub> ] | Brine initial density $\rho_0$ [kg/m <sup>3</sup> ] | CO <sub>2</sub> saturate brine density $\rho_s$ [kg/m <sup>3</sup> ] | Capacity of CO <sub>2</sub> dissolved in water $M_R$ [Mt CO <sub>2</sub> ] |
|-------|----------------|---------------------------------------------------------|----------------------|--------------------|------------------------------------------------------------------------------------|---------------------------------------------------------------|-----------------------------------------------------|----------------------------------------------------------------------|----------------------------------------------------------------------------|
| 1     | 847            | 1341.57                                                 | 9.12                 | 40.59              | 488.50                                                                             | 77.99                                                         | 1018.74                                             | 1273.43                                                              | 2.76                                                                       |
| 2     | 863            | 223.59                                                  | 9.29                 | 41.07              | 506.39                                                                             | 12.68                                                         | 1018.56                                             | 1273.20                                                              | 0.43                                                                       |
| 3     | 873            | 760.22                                                  | 9.40                 | 41.37              | 516.62                                                                             | 46.74                                                         | 1018.45                                             | 1273.06                                                              | 1.57                                                                       |
| 4     | 885            | 357.75                                                  | 9.52                 | 41.71              | 525.98                                                                             | 13.17                                                         | 1018.32                                             | 1272.91                                                              | 0.43                                                                       |
| 5     | 890            | 134.16                                                  | 9.58                 | 41.87              | 530.55                                                                             | 4.98                                                          | 1018.26                                             | 1272.83                                                              | 0.16                                                                       |
| 6     | 904            | 1162.69                                                 | 9.72                 | 42.06              | 545.99                                                                             | 62.21                                                         | 1018.19                                             | 1272.74                                                              | 1.97                                                                       |
| 7     | 917            | 89.44                                                   | 9.86                 | 42.64              | 547.86                                                                             | 3.43                                                          | 1017.97                                             | 1272.47                                                              | 0.11                                                                       |
| 8     | 919            | 89.44                                                   | 9.88                 | 42.70              | 548.78                                                                             | 3.44                                                          | 1017.95                                             | 1272.44                                                              | 0.11                                                                       |
| 9     | 921            | 134.16                                                  | 9.90                 | 42.76              | 549.68                                                                             | 1.55                                                          | 1017.93                                             | 1272.41                                                              | 0.05                                                                       |
| 10    | 925            | 178.88                                                  | 9.94                 | 42.86              | 552.01                                                                             | 6.91                                                          | 1017.89                                             | 1272.37                                                              | 0.22                                                                       |
| Total |                |                                                         |                      |                    |                                                                                    | 233.10                                                        |                                                     |                                                                      | 7.82                                                                       |
