# Supplementary material for: Influence of Injection Well Location on CO2 Geological Storage Efficiency
Source: MDPI journal article supplement (doi:10.3390/en14248604), 2021-12-20
Supplement: s1 [file s1]

**Table S5.** Dynamic capacity and CO<sub>2</sub> storage efficiency at each CO<sub>2</sub> injection well location in the Konary structure (coordinates X and Y in relation to Figure 2).

| Injection well location |      | Dynamic capacity<br>$M_{\text{dyn}}$<br>[Mt CO <sub>2</sub> ] |            | CO <sub>2</sub> storage<br>efficiency $E_{\text{dyn}}$ [%] |            | Injection well<br>distance from<br>the top of the<br>structure [m] | Injection well<br>depth difference<br>due to the top of<br>the structure [m] |
|-------------------------|------|---------------------------------------------------------------|------------|------------------------------------------------------------|------------|--------------------------------------------------------------------|------------------------------------------------------------------------------|
| X                       | Y    | Variant I                                                     | Variant II | Variant I                                                  | Variant II |                                                                    |                                                                              |
| 10300                   | 5200 | 12.12                                                         | 11.54      | 5.03                                                       | 4.79       | 435                                                                | 9                                                                            |
| 9500                    | 5000 | 10.87                                                         | 10.19      | 4.51                                                       | 4.23       | 498                                                                | 2                                                                            |
| 11200                   | 5100 | 11.85                                                         | 11.14      | 4.92                                                       | 4.62       | 1212                                                               | 6                                                                            |
| 8850                    | 5000 | 11.52                                                         | 11.09      | 4.78                                                       | 4.60       | 1158                                                               | 35                                                                           |
| 9650                    | 5600 | 11.98                                                         | 11.21      | 4.97                                                       | 4.65       | 966                                                                | 35                                                                           |
| 10500                   | 5900 | 12.64                                                         | 12.05      | 5.25                                                       | 5.00       | 960                                                                | 34                                                                           |
| 11500                   | 5700 | 11.92                                                         | 11.87      | 4.94                                                       | 4.92       | 1638                                                               | 34                                                                           |
| 11900                   | 5000 | 12.93                                                         | 12.16      | 5.37                                                       | 5.04       | 1905                                                               | 34                                                                           |
| 11500                   | 4400 | 12.86                                                         | 12.15      | 5.34                                                       | 5.04       | 1650                                                               | 34                                                                           |
| 10500                   | 4300 | 12.57                                                         | 11.66      | 5.22                                                       | 4.84       | 942                                                                | 34                                                                           |
| 9500                    | 4400 | 11.35                                                         | 10.70      | 4.71                                                       | 4.44       | 849                                                                | 34                                                                           |
| 12550                   | 5000 | 13.58                                                         | 12.22      | 5.64                                                       | 5.07       | 2556                                                               | 84                                                                           |
| 11900                   | 4050 | 13.32                                                         | 11.93      | 5.53                                                       | 4.95       | 2139                                                               | 84                                                                           |
| 12250                   | 6330 | 13.52                                                         | 12.42      | 5.61                                                       | 5.16       | 2586                                                               | 134                                                                          |
| 13180                   | 5000 | 13.86                                                         | 13.35      | 5.75                                                       | 5.55       | 3246                                                               | 134                                                                          |
| 6940                    | 5000 | 13.55                                                         | 12.72      | 5.63                                                       | 5.28       | 3057                                                               | 184                                                                          |
| 8700                    | 6240 | 12.97                                                         | 11.83      | 5.39                                                       | 4.92       | 1749                                                               | 184                                                                          |
| 10500                   | 6930 | 13.43                                                         | 12.83      | 5.58                                                       | 5.33       | 1929                                                               | 184                                                                          |
| 12700                   | 6777 | 13.72                                                         | 13.33      | 5.70                                                       | 5.53       | 3198                                                               | 184                                                                          |
| 13760                   | 5000 | 14.33                                                         | 13.54      | 5.95                                                       | 5.62       | 3765                                                               | 184                                                                          |
| 12600                   | 3525 | 13.68                                                         | 13.20      | 5.68                                                       | 5.48       | 3036                                                               | 184                                                                          |
| 10500                   | 3275 | 13.35                                                         | 13.51      | 5.54                                                       | 5.61       | 1884                                                               | 184                                                                          |
| 8700                    | 3920 | 14.46                                                         | 11.64      | 6.01                                                       | 4.84       | 1755                                                               | 184                                                                          |
| 5755                    | 5300 | 13.91                                                         | 13.68      | 5.78                                                       | 5.68       | 4257                                                               | 234                                                                          |
| 10500                   | 7315 | 14.06                                                         | 13.10      | 5.84                                                       | 5.44       | 2298                                                               | 234                                                                          |
| 13200                   | 7230 | 14.33                                                         | 13.78      | 5.95                                                       | 5.73       | 3864                                                               | 234                                                                          |
| 8400                    | 3762 | 14.69                                                         | 11.78      | 6.10                                                       | 4.89       | 2094                                                               | 234                                                                          |
| 5000                    | 5770 | 13.68                                                         | 13.03      | 5.68                                                       | 5.41       | 5034                                                               | 280                                                                          |
| 5800                    | 6300 | 14.58                                                         | 13.92      | 6.06                                                       | 5.79       | 4368                                                               | 275                                                                          |
| 6550                    | 5600 | 13.69                                                         | 13.13      | 5.69                                                       | 5.45       | 3480                                                               | 237                                                                          |
| 6400                    | 4800 | 13.71                                                         | 13.13      | 5.69                                                       | 5.45       | 3615                                                               | 220                                                                          |
| 7400                    | 6300 | 13.83                                                         | 13.27      | 5.75                                                       | 5.51       | 2865                                                               | 282                                                                          |
| 7500                    | 5700 | 13.47                                                         | 13.00      | 5.60                                                       | 5.40       | 2574                                                               | 228                                                                          |
| 6500                    | 6300 | 15.51                                                         | 14.76      | 6.44                                                       | 6.13       | 3714                                                               | 278                                                                          |
| 8400                    | 5700 | 12.25                                                         | 12.40      | 5.09                                                       | 5.15       | 1755                                                               | 152                                                                          |
| 7500                    | 4300 | 13.44                                                         | 12.84      | 5.58                                                       | 5.33       | 2619                                                               | 229                                                                          |
| 8350                    | 4500 | 11.91                                                         | 11.49      | 4.94                                                       | 4.77       | 1755                                                               | 111                                                                          |
| 9500                    | 6900 | 13.00                                                         | 13.10      | 5.40                                                       | 5.44       | 1884                                                               | 212                                                                          |
| 9700                    | 6400 | 12.04                                                         | 11.76      | 5.00                                                       | 4.88       | 1356                                                               | 126                                                                          |

|       |      |       |       |      |      |      |     |
|-------|------|-------|-------|------|------|------|-----|
| 9400  | 3500 | 12.98 | 12.40 | 5.39 | 5.15 | 1695 | 201 |
| 9800  | 3900 | 12.18 | 11.93 | 5.06 | 4.95 | 1200 | 94  |
| 11100 | 6150 | 12.43 | 12.04 | 5.16 | 5.00 | 1545 | 71  |
| 11200 | 3800 | 12.68 | 12.22 | 5.26 | 5.07 | 1767 | 93  |
| 12900 | 5900 | 13.01 | 12.44 | 5.40 | 5.17 | 3024 | 140 |
| 13000 | 4300 | 13.28 | 12.67 | 5.52 | 5.26 | 3111 | 130 |
| 11600 | 3200 | 13.34 | 12.90 | 5.54 | 5.36 | 2475 | 204 |
| 13700 | 4000 | 14.06 | 13.45 | 5.84 | 5.59 | 3864 | 205 |
| 13600 | 6200 | 13.91 | 13.24 | 5.78 | 5.50 | 3888 | 199 |
| 11400 | 7300 | 13.64 | 13.17 | 5.67 | 5.47 | 2595 | 217 |
| 12300 | 7300 | 14.02 | 13.46 | 5.82 | 5.59 | 3180 | 217 |
