# Supplementary material for: Influence of Injection Well Location on CO2 Geological Storage Efficiency
Source: MDPI journal article supplement (doi:10.3390/en14248604), 2021-12-20
Supplement: s1 [file s1]

**Table S6.** Dynamic capacity and CO<sub>2</sub> storage efficiency at each CO<sub>2</sub> injection well location in the Sierpc structure (coordinates X and Y in relation to Figure 3).

| Injection well location |      | Dynamic capacity<br>$M_{dyn}$<br>[Mt CO <sub>2</sub> ] |            | CO <sub>2</sub> storage efficiency $E_{dyn}$ [%] |            | Injection well distance from the top of the structure [m] | Injection well depth difference due to the top of the structure [m] |
|-------------------------|------|--------------------------------------------------------|------------|--------------------------------------------------|------------|-----------------------------------------------------------|---------------------------------------------------------------------|
|                         |      | Variant I                                              | Variant II | Variant I                                        | Variant II |                                                           |                                                                     |
| 12100                   | 2600 | 1.06                                                   | 1.06       | 0.52                                             | 0.52       | 105                                                       | 1                                                                   |
| 11000                   | 2650 | 1.06                                                   | 1.06       | 0.52                                             | 0.52       | 1008                                                      | 1                                                                   |
| 13300                   | 2650 | 1.06                                                   | 1.06       | 0.52                                             | 0.52       | 1197                                                      | 1                                                                   |
| 9655                    | 2700 | 1.06                                                   | 1.06       | 0.52                                             | 0.52       | 2387                                                      | 2                                                                   |
| 12100                   | 2085 | 1.06                                                   | 1.06       | 0.52                                             | 0.52       | 546                                                       | 22                                                                  |
| 15580                   | 2710 | 1.06                                                   | 1.06       | 0.52                                             | 0.52       | 3598                                                      | 22                                                                  |
| 12100                   | 3883 | 1.06                                                   | 1.06       | 0.52                                             | 0.52       | 1281                                                      | 47                                                                  |
| 16410                   | 3080 | 0.97                                                   | 0.97       | 0.47                                             | 0.47       | 4445                                                      | 47                                                                  |
| 7827                    | 2926 | 0.97                                                   | 0.97       | 0.47                                             | 0.47       | 4193                                                      | 47                                                                  |
| 15600                   | 3760 | 1.06                                                   | 1.06       | 0.52                                             | 0.52       | 3794                                                      | 47                                                                  |
| 12100                   | 1440 | 1.06                                                   | 0.87       | 0.52                                             | 0.43       | 1183                                                      | 72                                                                  |
| 12100                   | 4533 | 1.06                                                   | 0.97       | 0.52                                             | 0.47       | 1939                                                      | 72                                                                  |
| 7000                    | 3240 | 1.06                                                   | 0.97       | 0.52                                             | 0.47       | 5040                                                      | 72                                                                  |
| 17500                   | 3400 | 0.97                                                   | 0.97       | 0.47                                             | 0.47       | 5544                                                      | 72                                                                  |
| 7900                    | 2060 | 1.06                                                   | 0.97       | 0.52                                             | 0.47       | 4130                                                      | 72                                                                  |
| 7900                    | 4140 | 1.06                                                   | 1.06       | 0.52                                             | 0.52       | 4368                                                      | 72                                                                  |
| 16500                   | 2300 | 1.06                                                   | 1.06       | 0.52                                             | 0.52       | 4522                                                      | 72                                                                  |
| 16500                   | 4390 | 1.06                                                   | 1.06       | 0.52                                             | 0.52       | 4844                                                      | 72                                                                  |
| 12100                   | 1045 | 0.21                                                   | 0.21       | 0.10                                             | 0.10       | 1183                                                      | 97                                                                  |
| 12100                   | 5195 | 0.97                                                   | 0.97       | 0.47                                             | 0.47       | 2604                                                      | 97                                                                  |
| 5960                    | 3110 | 1.06                                                   | 0.97       | 0.52                                             | 0.47       | 6076                                                      | 97                                                                  |
| 18725                   | 3755 | 1.06                                                   | 1.06       | 0.52                                             | 0.52       | 6818                                                      | 97                                                                  |
| 6990                    | 1847 | 0.97                                                   | 0.87       | 0.47                                             | 0.43       | 5068                                                      | 97                                                                  |
| 6990                    | 4290 | 0.40                                                   | 0.59       | 0.19                                             | 0.29       | 5292                                                      | 97                                                                  |
| 17500                   | 2325 | 0.68                                                   | 0.68       | 0.33                                             | 0.33       | 5544                                                      | 97                                                                  |
| 17500                   | 4755 | 0.78                                                   | 0.97       | 0.38                                             | 0.47       | 5908                                                      | 97                                                                  |
| 6700                    | 2600 | 1.06                                                   | 0.97       | 0.52                                             | 0.47       | 5306                                                      | 83                                                                  |
| 9800                    | 5000 | 0.68                                                   | 0.78       | 0.33                                             | 0.38       | 3241                                                      | 97                                                                  |
| 9500                    | 1230 | 0.31                                                   | 0.31       | 0.15                                             | 0.15       | 2856                                                      | 97                                                                  |
| 8500                    | 1600 | 1.06                                                   | 0.97       | 0.52                                             | 0.47       | 3647                                                      | 84                                                                  |
| 8700                    | 4500 | 0.97                                                   | 0.97       | 0.47                                             | 0.47       | 3794                                                      | 78                                                                  |
| 10900                   | 4800 | 0.97                                                   | 0.97       | 0.47                                             | 0.47       | 2457                                                      | 83                                                                  |
| 11000                   | 3300 | 1.06                                                   | 1.06       | 0.52                                             | 0.52       | 1197                                                      | 24                                                                  |
| 10000                   | 4000 | 1.06                                                   | 0.97       | 0.52                                             | 0.47       | 2429                                                      | 52                                                                  |
| 11200                   | 4100 | 0.97                                                   | 0.97       | 0.47                                             | 0.47       | 1673                                                      | 57                                                                  |
| 10800                   | 1300 | 0.50                                                   | 0.87       | 0.24                                             | 0.43       | 1778                                                      | 85                                                                  |
| 10950                   | 2100 | 1.06                                                   | 0.97       | 0.52                                             | 0.47       | 1169                                                      | 17                                                                  |
| 9900                    | 1700 | 1.06                                                   | 1.06       | 0.52                                             | 0.52       | 2296                                                      | 60                                                                  |
| 17900                   | 3000 | 0.97                                                   | 0.97       | 0.47                                             | 0.47       | 5894                                                      | 90                                                                  |

|       |      |      |      |      |      |      |    |
|-------|------|------|------|------|------|------|----|
| 14700 | 5200 | 0.97 | 0.97 | 0.47 | 0.47 | 3766 | 97 |
| 14900 | 1250 | 0.40 | 0.40 | 0.20 | 0.20 | 3227 | 98 |
| 13400 | 4900 | 0.97 | 0.97 | 0.47 | 0.47 | 2695 | 84 |
| 15600 | 4900 | 0.97 | 0.97 | 0.47 | 0.47 | 4249 | 86 |
| 13500 | 1250 | 0.49 | 0.59 | 0.24 | 0.29 | 2044 | 85 |
| 16000 | 1800 | 1.06 | 0.87 | 0.52 | 0.42 | 4074 | 86 |
| 13000 | 4300 | 1.06 | 0.97 | 0.52 | 0.47 | 1995 | 63 |
| 14400 | 4100 | 1.06 | 0.97 | 0.52 | 0.47 | 2828 | 51 |
| 14300 | 1800 | 1.16 | 0.97 | 0.56 | 0.47 | 2443 | 54 |
| 13600 | 3400 | 1.07 | 1.07 | 0.52 | 0.52 | 1778 | 27 |
| 12800 | 1600 | 1.06 | 0.87 | 0.52 | 0.42 | 1302 | 60 |
