# Supplementary material for: Influence of Injection Well Location on CO2 Geological Storage Efficiency
Source: MDPI journal article supplement (doi:10.3390/en14248604), 2021-12-20
Supplement: s1 [file s1]

**Table S3.** Estimation results of the theoretical CO<sub>2</sub> storage capacity for the Sierpc structure in separate ten layers of the reservoir level.

| No    | Mean depth [m] | Geometric volume of layer $V_{trap}$ [Mm <sup>3</sup> ] | Pressure $P_i$ [MPa] | Temperature T [°C] | CO <sub>2</sub> density in reservoir conditions $\rho_{CO_2}$ [kg/m <sup>3</sup> ] | Theoretical Storage capacity $M_{CSLF}$ [Mt CO <sub>2</sub> ] | Brine initial density $\rho_0$ [kg/m <sup>3</sup> ] | CO <sub>2</sub> saturate brine density $\rho_s$ [kg/m <sup>3</sup> ] | Capacity of CO <sub>2</sub> dissolved in water $M_R$ [Mt CO <sub>2</sub> ] |
|-------|----------------|---------------------------------------------------------|----------------------|--------------------|------------------------------------------------------------------------------------|---------------------------------------------------------------|-----------------------------------------------------|----------------------------------------------------------------------|----------------------------------------------------------------------------|
| 1     | 2091           | 179.24                                                  | 21.01                | 59.91              | 739.48                                                                             | 14.16                                                         | 1074.68                                             | 1343.35                                                              | 0.20                                                                       |
| 2     | 2093           | 89.62                                                   | 21.04                | 59.96              | 739.52                                                                             | 5.90                                                          | 1074.66                                             | 1343.33                                                              | 0.08                                                                       |
| 3     | 2096           | 239.17                                                  | 21.06                | 60.02              | 739.57                                                                             | 18.74                                                         | 1074.64                                             | 1343.30                                                              | 0.26                                                                       |
| 4     | 2099           | 89.62                                                   | 21.09                | 60.08              | 739.62                                                                             | 5.95                                                          | 1074.62                                             | 1343.27                                                              | 0.08                                                                       |
| 5     | 2101           | 209.20                                                  | 21.12                | 60.13              | 739.67                                                                             | 14.80                                                         | 1074.60                                             | 1343.25                                                              | 0.21                                                                       |
| 6     | 2104           | 119.58                                                  | 21.14                | 60.19              | 739.72                                                                             | 6.48                                                          | 1074.58                                             | 1343.22                                                              | 0.09                                                                       |
| 7     | 2108           | 388.44                                                  | 21.19                | 60.28              | 739.79                                                                             | 27.73                                                         | 1074.54                                             | 1343.18                                                              | 0.39                                                                       |
| 8     | 2113           | 209.20                                                  | 21.24                | 60.38              | 739.88                                                                             | 17.24                                                         | 1074.50                                             | 1343.13                                                              | 0.24                                                                       |
| 9     | 2120           | 627.33                                                  | 21.31                | 60.53              | 740.01                                                                             | 43.10                                                         | 1074.45                                             | 1343.06                                                              | 0.61                                                                       |
| 10    | 2130           | 597.64                                                  | 21.41                | 60.74              | 740.19                                                                             | 48.45                                                         | 1074.37                                             | 1342.96                                                              | 0.68                                                                       |
| Total |                |                                                         |                      |                    |                                                                                    | 202.55                                                        |                                                     |                                                                      | 2.86                                                                       |
