# Supplementary material for: Influence of Injection Well Location on CO2 Geological Storage Efficiency
Source: MDPI journal article supplement (doi:10.3390/en14248604), 2021-12-20
Supplement: s1 [file s1]

**Table S7.** Dynamic capacity and CO<sub>2</sub> storage efficiency at each CO<sub>2</sub> injection well location in the Suliszewo structure (coordinates X and Y in relation to Figure 4).

| Injection well location |      | Dynamic capacity                          | CO <sub>2</sub> storage efficiency | Injection well distance from the top of the structure [m] | Injection well depth difference due to the top of the structure [m] |
|-------------------------|------|-------------------------------------------|------------------------------------|-----------------------------------------------------------|---------------------------------------------------------------------|
| X                       | Y    | $M_{\text{dyn}}$<br>[Mt CO <sub>2</sub> ] | $E_{\text{dyn}}$ [%]               |                                                           |                                                                     |
| 7700                    | 4875 | 93.37                                     | 23.89                              | 154                                                       | 0                                                                   |
| 8260                    | 4534 | 96.50                                     | 24.69                              | 968                                                       | 5                                                                   |
| 5800                    | 4800 | 102.77                                    | 26.29                              | 1595                                                      | 15                                                                  |
| 6900                    | 5315 | 98.82                                     | 25.28                              | 649                                                       | 15                                                                  |
| 8950                    | 5390 | 99.45                                     | 25.44                              | 1551                                                      | 15                                                                  |
| 9750                    | 4800 | 99.42                                     | 25.44                              | 2343                                                      | 15                                                                  |
| 7900                    | 4000 | 99.89                                     | 25.56                              | 1034                                                      | 15                                                                  |
| 6800                    | 4200 | 99.53                                     | 25.46                              | 924                                                       | 15                                                                  |
| 4500                    | 4900 | 105.96                                    | 27.11                              | 2882                                                      | 65                                                                  |
| 6100                    | 5760 | 103.64                                    | 26.51                              | 1540                                                      | 65                                                                  |
| 7600                    | 5859 | 99.74                                     | 25.52                              | 990                                                       | 65                                                                  |
| 10460                   | 4750 | 102.74                                    | 26.29                              | 3080                                                      | 65                                                                  |
| 9300                    | 3815 | 100.29                                    | 25.66                              | 2200                                                      | 65                                                                  |
| 7500                    | 3440 | 101.54                                    | 25.98                              | 1474                                                      | 65                                                                  |
| 6000                    | 3800 | 103.37                                    | 26.45                              | 1782                                                      | 65                                                                  |
| 3530                    | 4800 | 108.18                                    | 27.68                              | 3883                                                      | 115                                                                 |
| 11200                   | 4700 | 103.50                                    | 26.48                              | 3806                                                      | 115                                                                 |
| 4700                    | 3779 | 106.51                                    | 27.25                              | 2926                                                      | 115                                                                 |
| 2700                    | 4400 | 110.62                                    | 28.30                              | 4719                                                      | 165                                                                 |
| 5000                    | 6300 | 104.31                                    | 26.69                              | 2761                                                      | 165                                                                 |
| 7600                    | 2500 | 102.57                                    | 26.24                              | 2431                                                      | 165                                                                 |
| 4700                    | 3000 | 108.02                                    | 27.64                              | 3300                                                      | 165                                                                 |
| 1840                    | 4300 | 111.86                                    | 28.62                              | 5566                                                      | 215                                                                 |
| 7400                    | 6700 | 102.36                                    | 26.19                              | 1804                                                      | 215                                                                 |
| 9800                    | 6400 | 100.61                                    | 25.74                              | 2838                                                      | 215                                                                 |
| 12800                   | 3900 | 90.42                                     | 23.13                              | 5577                                                      | 215                                                                 |
| 10400                   | 2800 | 103.41                                    | 26.46                              | 3707                                                      | 215                                                                 |
| 7100                    | 1920 | 104.91                                    | 26.84                              | 3003                                                      | 215                                                                 |
| 4200                    | 2200 | 108.98                                    | 27.88                              | 4158                                                      | 215                                                                 |
| 2500                    | 5400 | 109.73                                    | 28.07                              | 4906                                                      | 216                                                                 |
| 3500                    | 6100 | 108.43                                    | 27.74                              | 4070                                                      | 220                                                                 |
| 3000                    | 2700 | 110.76                                    | 28.34                              | 4917                                                      | 221                                                                 |
| 6100                    | 6700 | 102.97                                    | 26.35                              | 2211                                                      | 216                                                                 |
| 5600                    | 2000 | 106.68                                    | 27.29                              | 3421                                                      | 213                                                                 |
| 8600                    | 6600 | 100.83                                    | 25.80                              | 2079                                                      | 209                                                                 |
| 9000                    | 2700 | 103.05                                    | 26.36                              | 2739                                                      | 211                                                                 |
| 11000                   | 5900 | 102.66                                    | 26.26                              | 3729                                                      | 214                                                                 |
| 12000                   | 5000 | 103.99                                    | 26.61                              | 4598                                                      | 210                                                                 |
| 11700                   | 3400 | 104.18                                    | 26.65                              | 4565                                                      | 219                                                                 |

|       |      |        |       |      |     |
|-------|------|--------|-------|------|-----|
| 3300  | 3500 | 109.81 | 28.09 | 4334 | 166 |
| 6000  | 2700 | 104.20 | 26.66 | 2596 | 167 |
| 11000 | 3800 | 103.94 | 26.59 | 3784 | 164 |
| 4300  | 5800 | 105.96 | 27.11 | 3234 | 115 |
| 9400  | 2900 | 101.50 | 25.97 | 2849 | 154 |
| 5100  | 5400 | 104.58 | 26.76 | 2332 | 57  |
| 5200  | 4400 | 104.67 | 26.78 | 2266 | 50  |
| 8800  | 3300 | 101.22 | 25.90 | 2134 | 86  |
| 8400  | 6000 | 99.23  | 25.39 | 1485 | 88  |
| 9900  | 5400 | 99.90  | 25.56 | 2552 | 60  |
| 10200 | 4200 | 102.30 | 26.17 | 2893 | 75  |
