# Supplementary material for: Influence of Injection Well Location on CO2 Geological Storage Efficiency
Source: MDPI journal article supplement (doi:10.3390/en14248604), 2021-12-20
Supplement: s1 [file s1]

**Table S1.** Maximum pressures, Peaceman correlation, and fracturing pressures in each distributed layer for the example injection well located in the Konary structure with coordinates (9500; 5000)

| Lp. | Simulator well cell pressure [MPa] |          | Flowing bottom hole pressure (Peaceman correlation) [MPa] |          | Difference of results [MPa] |          | Fracturing pressure [MPa] |
|-----|------------------------------------|----------|-----------------------------------------------------------|----------|-----------------------------|----------|---------------------------|
|     | Stage I                            | Stage II | Stage I                                                   | Stage II | Stage I                     | Stage II |                           |
| 1   | 8.16                               | 8.16     | 8.17                                                      | 8.16     | 0.004                       | 0.003    | 14.06                     |
| 2   | 8.61                               | 8.25     | 8.62                                                      | 8.26     | 0.014                       | 0.010    | 14.29                     |
| 3   | 8.55                               | 8.28     | 8.56                                                      | 8.28     | 0.006                       | 0.004    | 14.44                     |
| 4   | 10.55                              | 8.41     | 10.68                                                     | 8.51     | 0.138                       | 0.100    | 14.60                     |
| 5   | 10.14                              | 8.43     | 10.21                                                     | 8.48     | 0.072                       | 0.052    | 14.67                     |
| 6   | 9.11                               | 8.47     | 9.13                                                      | 8.48     | 0.012                       | 0.009    | 14.86                     |
| 7   | 9.93                               | 8.58     | 9.99                                                      | 8.63     | 0.065                       | 0.047    | 15.04                     |
| 8   | 9.91                               | 8.59     | 9.93                                                      | 8.60     | 0.019                       | 0.014    | 15.07                     |
| 9   | 11.42                              | 8.71     | 12.20                                                     | 9.28     | 0.780                       | 0.566    | 15.11                     |
| 10  | 9.65                               | 8.65     | 9.67                                                      | 8.67     | 0.025                       | 0.018    | 15.15                     |
