# Supplementary material for: Influence of Injection Well Location on CO2 Geological Storage Efficiency
Source: MDPI journal article supplement (doi:10.3390/en14248604), 2021-12-20
Supplement: s1 [file s1]

**Table S4.** Estimation results of the theoretical CO<sub>2</sub> storage capacity for the Suliszewo structure in separate ten layers of the reservoir level.

| No    | Mean depth [m] | Geometric volume of layer $V_{trap}$ [Mm <sup>3</sup> ] | Pressure $P_i$ [MPa] | Temperature T [°C] | CO <sub>2</sub> density in reservoir conditions $\rho_{CO_2}$ [kg/m <sup>3</sup> ] | Theoretical Storage capacity $M_{CSLF}$ [Mt CO <sub>2</sub> ] | Brine initial density $\varrho_0$ [kg/m <sup>3</sup> ] | CO <sub>2</sub> saturate brine density $\varrho_s$ [kg/m <sup>3</sup> ] | Capacity of CO <sub>2</sub> dissolved in water $M_R$ [Mt CO <sub>2</sub> ] |
|-------|----------------|---------------------------------------------------------|----------------------|--------------------|------------------------------------------------------------------------------------|---------------------------------------------------------------|--------------------------------------------------------|-------------------------------------------------------------------------|----------------------------------------------------------------------------|
| 1     | 1328           | 1114.12                                                 | 13.06                | 62.52              | 478.59                                                                             | 96.30                                                         | 1009.30                                                | 1261.63                                                                 | 2.25                                                                       |
| 2     | 1343           | 401.66                                                  | 13.20                | 63.03              | 481.60                                                                             | 35.38                                                         |                                                        |                                                                         | 0.82                                                                       |
| 3     | 1349           | 207.05                                                  | 13.26                | 63.24              | 516.62                                                                             | 16.22                                                         |                                                        |                                                                         | 0.35                                                                       |
| 4     | 1356           | 582.89                                                  | 13.33                | 63.50              | 525.98                                                                             | 59.66                                                         |                                                        |                                                                         | 1.27                                                                       |
| 5     | 1366           | 375.83                                                  | 13.42                | 63.83              | 530.55                                                                             | 33.90                                                         |                                                        |                                                                         | 0.71                                                                       |
| 6     | 1375           | 569.97                                                  | 13.51                | 64.15              | 545.99                                                                             | 57.33                                                         |                                                        |                                                                         | 1.17                                                                       |
| 7     | 1384           | 336.64                                                  | 13.60                | 64.45              | 547.86                                                                             | 9.84                                                          |                                                        |                                                                         | 0.20                                                                       |
| 8     | 1390           | 297.90                                                  | 13.66                | 64.67              | 548.78                                                                             | 26.06                                                         |                                                        |                                                                         | 0.53                                                                       |
| 9     | 1395           | 220.43                                                  | 13.71                | 64.84              | 549.68                                                                             | 4.45                                                          |                                                        |                                                                         | 0.09                                                                       |
| 10    | 1402           | 504.95                                                  | 13.78                | 65.09              | 552.01                                                                             | 43.45                                                         |                                                        |                                                                         | 0.88                                                                       |
| Total |                |                                                         |                      |                    |                                                                                    | 382.59                                                        |                                                        |                                                                         | 8.28                                                                       |
